# Supplementary material for: SERPINA1 gene regulates the tumorigenesis and progression of breast cancer through PI3K/AKT signaling pathway and tumor immune microenvironment
Source: Research Square preprint supplement (doi:10.21203/rs.3.rs-6334463/v1), 2025-05-12
Supplement: Supplementary file 1 [file 7c224bd5159cb55ce354f3c3.docx]

Supplementary Table 1 Comparison of clinicopathological characteristics between high and low expression groups of SERPINA1 gene in TCGA-BRCA patients

| Characteristics | Low expression group | High expression group | *P* value |
| --- | --- | --- | --- |
| N | 543 | 544 |  |
| Age, n (%) |  |  | 0.924 |
| <= 60 | 302 (27.8%) | 301 (27.7%) |  |
| > 60 | 241 (22.2%) | 243 (22.4%) |  |
| T stage, n (%) |  |  | **0.001*** |
| T1 | 111 (10.2%) | 167 (15.4%) |  |
| T2 | 333 (30.7%) | 298 (27.5%) |  |
| T3 | 80 (7.4%) | 60 (5.5%) |  |
| T4 | 18 (1.7%) | 17 (1.6%) |  |
| N stage, n (%) |  |  | 0.093 |
| N0 | 259 (24.3%) | 257 (24.1%) |  |
| N1 | 168 (15.7%) | 191 (17.9%) |  |
| N2 | 55 (5.1%) | 61 (5.7%) |  |
| N3 | 48 (4.5%) | 29 (2.7%) |  |
| M stage, n (%) |  |  | 0.147 |
| M0 | 440 (47.6%) | 465 (50.3%) |  |
| M1 | 13 (1.4%) | 7 (0.8%) |  |
| Pathologic stage, n (%) |  |  | 0.240 |
| Stage I | 82 (7.7%) | 100 (9.4%) |  |
| Stage II | 311 (29.3%) | 308 (29%) |  |
| Stage III | 127 (11.9%) | 117 (11%) |  |
| Stage IV | 12 (1.1%) | 6 (0.6%) |  |
| Pathological type, n (%) |  |  | 0.567 |
| Invasive ductal carcinoma | 388 (37.9%) | 388 (37.9%) |  |
| Invasive lobular carcinoma | 108 (10.5%) | 97 (9.5%) |  |
| Other special types | 19 (1.9%) | 24 (2.3%) |  |
| ER status, n (%) |  |  | 0.085 |
| Negative | 132 (12.7%) | 108 (10.4%) |  |
| Ambiguous | 2 (0.2%) | 0 (0%) |  |
| Positive | 388 (37.3%) | 409 (39.4%) |  |
| PR status, n (%) |  |  | **< 0.001*** |
| Negative | 218 (21%) | 124 (11.9%) |  |
| Ambiguous | 0 (0%) | 4 (0.4%) |  |
| Positive | 303 (29.2%) | 389 (37.5%) |  |
| HER2 status, n (%) |  |  | **0.035*** |
| Negative | 266 (36.5%) | 294 (40.3%) |  |
| Ambiguous | 8 (1.1%) | 4 (0.5%) |  |
| Positive | 91 (12.5%) | 66 (9.1%) |  |
| PAM50, n (%) |  |  | **< 0.001*** |
| Lum A | 244 (23.3%) | 320 (30.6%) |  |
| Lum B | 124 (11.8%) | 82 (7.8%) |  |
| Her2 | 46 (4.4%) | 36 (3.4%) |  |
| Basal | 116 (11.1%) | 79 (7.5%) |  |
| Tumor location, n (%) |  |  | 0.172 |
| Left | 294 (27%) | 272 (25%) |  |
| Right | 249 (22.9%) | 272 (25%) |  |
| Menopausal state, n (%) |  |  | 0.383 |
| premenopausal | 111 (11.4%) | 119 (12.2%) |  |
| perimenopausal | 24 (2.5%) | 16 (1.6%) |  |
| menopause | 348 (35.7%) | 358 (36.7%) |  |
| OS events, n (%) |  |  | **0.008*** |
| Survive | 452 (41.6%) | 483 (44.4%) |  |
| Death | 91 (8.4%) | 61 (5.6%) |  |
| DSS events, n (%) |  |  | **< 0.001*** |
| No | 473 (44.3%) | 509 (47.7%) |  |
| Yes | 60 (5.6%) | 25 (2.3%) |  |
| PFI events, n (%) |  |  | **< 0.001*** |
| No | 448 (41.2%) | 492 (45.3%) |  |
| Yes | 95 (8.7%) | 52 (4.8%) |  |

Supplementary Table 2 Go analysis results of differential variable shear events

| Term | ID | Rich factor | P Value |
| --- | --- | --- | --- |
| negative regulation of TOR signaling | GO:0032007 | 3.31 | 0.001 |
| phosphatidylinositol-3-phosphate biosynthetic process | GO:0036092 | 4.42 | 0.009 |
| positive regulation of phosphatidylinositol 3-kinase activity | GO:0043552 | 2.99 | 0.012 |
| phosphatidylinositol phosphorylation | GO:0046854 | 2.21 | 0.027 |
| negative regulation of phosphatase activity | GO:0010923 | 2.27 | 0.029 |
| positive regulation of intrinsic apoptotic signaling pathway in response to DNA damage | GO:1902231 | 5.16 | 0.047 |

Supplementary Table 3 Basic information of enrolled patients

| **Clinicopathological Characteristics** | **N** | **Ratio（%）** |
| --- | --- | --- |
| **Expression of SERPINA1** |  |  |
| Low | 51 | 53.70 |
| High | 44 | 46.30 |
| **Treg lymphocyte infiltration status** | |  |
| Low | 48 | 50.5 |
| High | 47 | 49.5 |
| **Age** |  |  |
| ＜50 | 49 | 51.6 |
| ≥50 | 46 | 48.4 |
| **Histological stage** |  |  |
| Ⅰ | 11 | 11.6 |
| Ⅱ | 55 | 57.9 |
| Ⅲ | 29 | 30.5 |
| **Vascular tumor thrombus or nerve invasion** |  |  |
| Negative | 50 | 52.6 |
| Positive | 45 | 47.4 |
| **ER** **status** |  |  |
| Negative | 19 | 20 |
| Positive | 76 | 80 |
| **PR status** |  |  |
| Negative | 23 | 24.2 |
| Positive | 72 | 75.8 |
| **HER2 status** |  |  |
| Negative | 77 | 81.1 |
| Positive | 18 | 18.9 |
| **Expression of ki67** |  |  |
| ＜30% | 53 | 55.8 |
| ≥30% | 42 | 44.2 |
| **T** **stage** |  |  |
| T1 | 57 | 60 |
| T2+T3 | 38 | 45.3 |
| **N stage** |  |  |
| N0 | 52 | 54.7 |
| N1+N2+N3 | 43 | 45.3 |
| **Clinical stage** |  |  |
| I | 42 | 44.2 |
| II+III | 53 | 55.8 |
| **Molecular typing** |  |  |
| Luminal A | 26 | 27.4 |
| Luminal B | 39 | 41.1 |
| HER2 positve | 20 | 21.1 |
| Basel like | 10 | 10.5 |
| **Recurrence /Metastasis** |  |  |
| No | 84 | 88.4 |
| Yes | 11 | 11.6 |
| **Death** |  |  |
| No | 94 | 98.9 |
| Yes | 1 | 1.1 |

Supplementary Table 4 Comparison of clinicopathological characteristics between different expression groups of SERPINA1

| **Clinicopathological Characteristics** | **SERPINA1**  **High** | **SERPINA1**  **Low** | **P value** |
| --- | --- | --- | --- |
| N | 51 | 44 |  |
| **Treg lymphocyte infiltration status, n (%)** |  |  | **0.031*** |
| Low | 27 (28.4%) | 20 (21.1%) |  |
| High | 17 (17.9%) | 31 (32.6%) |  |
| **Age, n (%)** |  |  | 0.900 |
| ＜50 | 23 (24.2%) | 26 (27.4%) |  |
| ≥50 | 21 (22.1%) | 25 (26.3%) |  |
| **Histological stage** |  |  | 0.403 |
| Ⅰ | 3 (3.2%) | 8 (8.4%) |  |
| Ⅱ | 27 (28.4%) | 28 (29.5%) |  |
| Ⅲ | 14 (14.7%) | 15 (15.8%) |  |
| **Vascular tumor thrombus or nerve invasion** |  |  | 0.242 |
| Negative | 26 (27.4%) | 24 (25.3%) |  |
| Positive | 18 (18.9%) | 27 (28.4%) |  |
| **ER status** |  |  | 0.537 |
| Negative | 10 (10.5%) | 9 (9.5%) |  |
| Positive | 34 (35.8%) | 42 (44.2%) |  |
| **PR status** |  |  | 0.518 |
| Negative | 12 (12.6%) | 11 (11.6%) |  |
| Positive | 32 (33.7%) | 40 (42.1%) |  |
| **HER2 status** |  |  | **0.014*** |
| Negative | 31 (32.6%) | 46 (48.4%) |  |
| Positive | 13 (13.7%) | 5 (5.3%) |  |
| **Expression of ki67** |  |  | 0.291 |
| ＜30% | 22 (23.2%) | 20 (21.1%) |  |
| ≥30% | 22 (23.2%) | 31 (32.6%) |  |
| **T stage** |  |  | 0.867 |
| T1 | 26 (27.4%) | 31 (32.6%) |  |
| T2+T3 | 18 (18.9%) | 20 (21.1%) |  |
| **N stage** |  |  | 0.654 |
| N0 | 23 (24.2%) | 29 (30.5%) |  |
| N1+N2+N3 | 21 (22.1%) | 22 (23.2%) |  |
| **Clinical stage** |  |  | 0.851 |
| I | 19 (20%) | 23 (24.2%) |  |
| II+III | 25 (26.3%) | 28 (29.5%) |  |
| **Molecular typing** |  |  | **0.006*** |
| Luminal A | 10 (10.5%) | 16 (16.8%) |  |
| Luminal B | 18 (18.9%) | 21 (22.1%) |  |
| HER2 positve | 15 (15.8%) | 5 (5.3%) |  |
| Basel like | 1 (1.1%) | 9 (9.5%) |  |
| **Recurrence /Metastasis** |  |  | 0.951 |
| No | 39 (41.1%) | 45 (47.4%) |  |
| Yes | 5 (5.3%) | 6 (6.3%) |  |
| **Death** |  |  | 0.463 |
| No | 43 (45.3%) | 51 (53.7%) |  |
| Yes | 0 (0%) | 1 (1.1%) |  |

Supplementary Table 5 Comparison of clinicopathological features among patients with different Treg lymphocyte infiltration groups

| **Clinicopathological Characteristics** | **Treg lymphocyte**  **High** | **Treg lymphocyte**  **Low** | **P value** |
| --- | --- | --- | --- |
| N | 47 | 48 |  |
| **Expression of SERPINA1, n (%)** |  |  | **0.031*** |
| Low | 27 (28.4%) | 17 (17.9%) |  |
| High | 20 (21.1%) | 31 (32.6%) |  |
| **Age****, n (%)** |  |  | 0.051 |
| ＜50 | 29 (30.5%) | 20 (21.1%) |  |
| ≥50 | 18 (18.9%) | 28 (29.5%) |  |
| **Histological stage** |  |  | **< 0.001*** |
| Ⅰ | 2 (2.1%) | 9 (9.5%) |  |
| Ⅱ | 22 (23.2%) | 33 (34.7%) |  |
| Ⅲ | 23 (24.2%) | 6 (6.3%) |  |
| **Vascular tumor thrombus or nerve invasion** |  |  | 0.762 |
| Negative | 24 (25.3%) | 26 (27.4%) |  |
| Positive | 23 (24.2%) | 22 (23.2%) |  |
| **ER status** |  |  | **< 0.001*** |
| Negative | 16 (16.8%) | 3 (3.2%) |  |
| Positive | 31 (32.6%) | 45 (47.4%) |  |
| **PR status** |  |  | **0.027*** |
| Negative | 16 (16.8%) | 7 (7.4%) |  |
| Positive | 31 (32.6%) | 41 (43.2%) |  |
| **HER2 status** |  |  | **0.001*** |
| Negative | 32 (33.7%) | 45 (47.4%) |  |
| Positive | 15 (15.8%) | 3 (3.2%) |  |
| **Expression of ki67** |  |  | **< 0.001*** |
| ＜30% | 31 (32.6%) | 11 (11.6%) |  |
| ≥30% | 16 (16.8%) | 37 (38.9%) |  |
| **T stage** |  |  | **0.009*** |
| T1 | 25 (26.3%) | 13 (13.7%) |  |
| T2+T3 | 22 (23.2%) | 35 (36.8%) |  |
| **N stage** |  |  | 0.477 |
| N0 | 24 (25.3%) | 28 (29.5%) |  |
| N1+N2+N3 | 23 (24.2%) | 20 (21.1%) |  |
| **Clinical stage** |  |  | 0.251 |
| I | 18 (18.9%) | 24 (25.3%) |  |
| II+III | 29 (30.5%) | 24 (25.3%) |  |
| **Molecular typing** |  |  | **0.002*** |
| Luminal A | 7 (7.4%) | 19 (20%) |  |
| Luminal B | 17 (17.9%) | 22 (23.2%) |  |
| HER2 positve | 16 (16.8%) | 4 (4.2%) |  |
| Basel like | 7 (7.4%) | 3 (3.2%) |  |
| **Recurrence /Metastasis** |  |  | 0.777 |
| No | 42 (44.2%) | 42 (44.2%) |  |
| Yes | 5 (5.3%) | 6 (6.3%) |  |
| **Death** |  |  | 1.000 |
| No | 47 (49.5%) | 47 (49.5%) |  |
| Yes | 0 (0%) | 1 (1.1%) |  |

Supplementary Table 6 Main experimental reagents

| **Reagents Name** | **Manufacturer** |
| --- | --- |
| PBS solution | Pricella |
| Fetal bovine serum | Hyclone |
| RPMI1640 culture medium | Xigong |
| DMEM culture medium | Xigong |
| Recombinant human insulin solution（10mg/ml） | Pricella |
| 0.25% Trypsase | Pricella |
| Puromycin | ThermoFisher |
| Serum-Free Cell Freezing Medium | Aqlabtech |
| lipo3000 Transfection reagent | ThermoFisher |
| PMSF | Sigma |
| Protease inhibitor（50X） | Applygen |
| NP-40 Detergent solution | ThermoFisher |
| PageRuler Prestained Protein Ladder | Thermo |
| TRIZOLReagent | Invitrogen |
| Defatted milk powder | Oxoid |
| Matrigel | BD |
| ECL hypersensitive luminous solution | LABLEAD |
| G250 staining solution | Beyotime |
| Crystal violet dye solution | Beyotime |
| Tween-20 | Amresco |
| Denatured protein electrophoresis preformed gel (10%) and electrophoresis buffer | Solaebio |
| 5 × protein loading buffer | Applygen |

Supplementary Table 7 Main experimental antibodies

| **Antibodies** | **Manufacturer** | **Dilution Ratio** |
| --- | --- | --- |
| SERPINA1(WB) | proteintech | 1:5000 |
| SERPINA1(IHC) | Abcam | 1:300 |
| Foxp3 | Abcam | 1:500 |
| PTEN | ZSGB-BIO | 1:1000 |
| PI3K | CST | 1:1000 |
| p-PI3K | CST | 1:1000 |
| AKT | CST | 1:2000 |
| p-AKT | CST | 1:2000 |
| mTOR | CST | 1:1000 |
| p-mTOR | CST | 1:1000 |
| PARP | CST | 1:1000 |
| caspase3 | CST | 1:1000 |
| GAPDH | proteintech | 1:1000 |
| Goat anti mouse horseradish peroxidase labeled secondary antibody | ZSGB-BIO | 1:5000 |
| Goat anti rabbit horseradish peroxidase labeled secondary antibody | ZSGB-BIO | 1:5000 |

Supplementary Table 8 Main experimental instruments

| **Experimental Instruments** | **Manufacturer** |
| --- | --- |
| CO2 constant temperature cell culture Incubator | SANYO |
| Electron upright white light microscope | Leica |
| Electron inverted fluorescence microscope | Leica |
| Microplate Reader | Thermo |
| High speed low-temperature centrifuge | Thermo |
| Desktop horizontal centrifuge | SIGMA |
| 4℃ Refrigerator | Thermo |
| -20℃ Refrigerator | Thermo |
| -80℃ Refrigerator | Thermo |
| LAS-4000 Imaging system | Fujifilm |
| Trans-blot SD | BIO-RAD |
| Electrophoresis tank | BIO-RAD |
| Electrophoresis apparatus | BIO-RAD |
| Votex oscillator | QT-1 |
| Constant temperature water bath | Beijing changfeng |
| Decolorization shaker | Qilinbeier |
| iCELLigence Cell function analyzer | ACEA Biosciences |

Supplementary Table 9 The set of RTCA program

|  | Sweeps | Interval | Unit | Total time |
| --- | --- | --- | --- | --- |
| Step 1 | 1 | 1 | min | 1min |
| Step 2 | 180 | 30 | min | 108hrs |

**Abbreviations**

| A1AT | Alpha-1 Antitrypsin |
| --- | --- |
| A3SS | Alternative 3’ Splice site |
| A5SS | Alternative 5’ Splice site |
| AJCC | American Joint Committee on Cancer |
| AUC | Area Under Curve |
| BRCA | Breast Cancer |
| CCLE | Cancer Cell Line Encyclopedia |
| CI | Cell Index |
| DSS | Disease Specific Survival |
| ECL | Enhanced Chemiluminescence |
| EGFR | Epidermal Growth Factor Receptor |
| ER | Estrogen Receptor |
| FDR | False Discovery Rate |
| GDSC | Genomics of Drug Sensitivity in Cancer |
| GEO | Gene Expression Omnibus |
| GO | Gene Ontology |
| GTEx | Genotype-Tissue Expression |
| HER2 | Human Epidermal Growth Factor Receptor 2 |
| KEGG | Kyoto Encyclopedia of Genes and Genomes |
| MOI | Multiplicity of Infection |
| MXE | Mutually Exclusive Exon |
| NSCLC | Non-small Cell Lung Cancer |
| OS | Overall Survival |
| PAR-2 | Protease-activated Receptor-2 |
| PARP | Poly（ADP-ribose）Polymerase |
| PBS | Phosphate Buffer Solution |
| PFI | Progress Free Interval |
| PI3K | Phosphatidylinositol 3-kinase |
| PIP2 | Phosphatidylinositol 2,4,5-trisphosphate |
| PIP3 | Phosphatidylinositol 3,4,5-trisphosphate |
| PMSF | Phenylmethanesulfonylfluoride |
| PPIs | Protein-Protein Interaction Networks |
| PR | Progesterone Receptor |
| PTEN | Phosphatase and Tensin Homolog Deleted on Chromosome Ten |
| PVDF | Polyvinylidene Difluoride |
| RI | Retained Intron |
| ROC | Receiver Operating Characteristic Curves |
| RTCA | Real-time Cellular Analysis |
| SE | Skipped Exon |
| ssGSEA | single sample Gene Set Enrichment Analysis |
| TCGA | The Cancer Genome Atlas |
| TF | Tissue Factor |
| TIL | Tumor-infiltrating Lymphocytes |
| TME | Tumor Microenvironment |
| TNBC | Triple Negative Breast Cancer |
| Treg | cells Regulatory T cells |
| UICC | Union for International Cancer Control |
| WHO | World Health Organization |
